# Supplementary material for: Mental Health Staffing at HRSA-Funded Health Centers May Improve Access to Care
Source: Atypon-hosted journal article supplement (doi:10.1176/appi.ps.202000337), 2021-06-02
Supplement: appi.ps.202000337.ds001.pdf [file appi.ps.202000337.ds001.pdf]

**Appendix Table A1. Detailed information on construction of variables**

| Variable                                                        | Survey Question and construction detail                                                                                                                                                                                                                                                                                                                                                                                                                                                                                                                                                                                                                                                                                                                                                                                                                                                     | Data Source                       |
|-----------------------------------------------------------------|---------------------------------------------------------------------------------------------------------------------------------------------------------------------------------------------------------------------------------------------------------------------------------------------------------------------------------------------------------------------------------------------------------------------------------------------------------------------------------------------------------------------------------------------------------------------------------------------------------------------------------------------------------------------------------------------------------------------------------------------------------------------------------------------------------------------------------------------------------------------------------------------|-----------------------------------|
| <b>Dependent variables</b>                                      |                                                                                                                                                                                                                                                                                                                                                                                                                                                                                                                                                                                                                                                                                                                                                                                                                                                                                             |                                   |
| Received Mental Health Treatment Anywhere in the Last 12 months | <p>Respondents were asked “In the past 12 months, that is since {12 MONTH REFERENCE DATE}, did you receive any mental health treatment or counseling?”</p> <ul style="list-style-type: none"> <li>• Yes</li> <li>• No</li> </ul>                                                                                                                                                                                                                                                                                                                                                                                                                                                                                                                                                                                                                                                            | 2014 Health Center Patient Survey |
| On-Site Patient Utilization of Mental Health Services           | <p>Among patients that responded they receiving mental health treatment of counseling, patients were asked: “What kind of treatment and/or counseling was it? You may select one or more. Was it ...?”</p> <ul style="list-style-type: none"> <li>• Individual counseling</li> <li>• Group counseling</li> <li>• Family or couples counseling</li> <li>• Prescription medication</li> <li>• Inpatient treatment in a general hospital or mental health treatment facility</li> </ul> <p>Those who indicated their treatment were individual, group, family or couples counseling, or prescription medication were asked: “How many of your treatment or counseling sessions you received did you get at {REFERENCE HEALTH CENTER}? Would you say...?”</p> <ul style="list-style-type: none"> <li>• All of the visits</li> <li>• Some of the visits</li> <li>• None of the visits</li> </ul> | 2014 Health Center Patient Survey |
| <b>Independent variables</b>                                    |                                                                                                                                                                                                                                                                                                                                                                                                                                                                                                                                                                                                                                                                                                                                                                                                                                                                                             |                                   |
| Mental Health Provider Staffing                                 | <p>Due to highly skewed and multimodal distributions, an indicator variable was created for whether a health center had:</p> <ul style="list-style-type: none"> <li>• No mental health full-time equivalent (FTE) per 2,000 patients</li> <li>• Less than one mental health FTE per 2,000 patients</li> </ul>                                                                                                                                                                                                                                                                                                                                                                                                                                                                                                                                                                               | 2013 Uniform Data System          |

|                                                               |                                                                                                                                                                                                                                                                                                                                                                                                                                                                                                     |                          |
|---------------------------------------------------------------|-----------------------------------------------------------------------------------------------------------------------------------------------------------------------------------------------------------------------------------------------------------------------------------------------------------------------------------------------------------------------------------------------------------------------------------------------------------------------------------------------------|--------------------------|
|                                                               | <ul style="list-style-type: none"> <li>At least one mental health FTE per 2,000 patients</li> </ul> <p>The cutoff of one FTE was chosen to distinguish between part-time and full-time staffing.</p> <p>Mental health staff include psychiatrists, licensed clinical psychologists, licensed clinical social workers, other licensed mental health providers</p>                                                                                                                                    |                          |
| Type of mental health provider                                | <p>Full time equivalent of the following types of mental health staff:</p> <ul style="list-style-type: none"> <li>Psychiatrist</li> <li>Psychologists</li> <li>Other licensed mental health providers (including clinical social workers)</li> </ul>                                                                                                                                                                                                                                                | 2013 Uniform Data System |
| <i>Health center characteristics</i>                          |                                                                                                                                                                                                                                                                                                                                                                                                                                                                                                     |                          |
| Number of patients per FTE primary care providers (PCP) ratio | <p>Patient per PCP ratio was categorized into:</p> <ul style="list-style-type: none"> <li>Small (under 1,200, reference)</li> <li>Medium (1,200-1,999)</li> <li>Large (2,000 or more)</li> </ul> <p>These panel size categories were based on the 25<sup>th</sup> and 75<sup>th</sup> percentile of the distribution due to skewness.</p> <p>Number of patients per FTE PCP. PCPs include: family physicians, general practitioners, internists, nurse practitioners, and physician assistants.</p> | 2013 Uniform Data System |
| Clinical support staff to PCP ratio                           | <p>Clinical support staff to PCP ratio was categorized into:</p> <ul style="list-style-type: none"> <li>2 FTE or less (reference)</li> <li>&gt;2 - ≤ 4 FTE</li> <li>&gt;4 FTE</li> </ul> <p>Due to skewness, this variable was categorized based on cutoffs that reflected groupings within the distribution.</p> <p>Clinic support staff included:</p> <ul style="list-style-type: none"> <li>Registered nurses</li> <li>Licensed practical and vocational nurses</li> </ul>                       | 2013 Uniform Data System |

|                                                                                                                        |                                                                                                                                                                                                                                                                                                                                                                                                           |                                   |
|------------------------------------------------------------------------------------------------------------------------|-----------------------------------------------------------------------------------------------------------------------------------------------------------------------------------------------------------------------------------------------------------------------------------------------------------------------------------------------------------------------------------------------------------|-----------------------------------|
|                                                                                                                        | <ul style="list-style-type: none"> <li>• Home health and visiting nurses</li> <li>• Clinical nursing specialists</li> <li>• Public health nurses</li> <li>• Medical assistants</li> <li>• Nurses' aides</li> </ul>                                                                                                                                                                                        |                                   |
| Number of clinics within the health center organization.                                                               | <p>Number of clinics within the health center organization was categorized based on groupings within the distribution:</p> <ul style="list-style-type: none"> <li>• Low (10 or fewer, reference)</li> <li>• Medium (11-19)</li> <li>• Large (20 or more)</li> </ul>                                                                                                                                       | 2013 Uniform Data System          |
| Percent of patients diagnosed with depression at the patient's health center where they were interviewed               | <p>Percent of patients diagnosed with depression was categorized as:</p> <ul style="list-style-type: none"> <li>• Low (5% or less, reference)</li> <li>• Medium (more than 5% but less than 15%)</li> <li>• High (15% or more)</li> </ul>                                                                                                                                                                 | 2013 Uniform Data System          |
| Percent of total revenue from Medicaid managed care contracts at the patient's health center where they were interview | <p>Percent of total revenue from Medicaid managed care contracts was categorized as:</p> <ul style="list-style-type: none"> <li>• No revenue (reference)</li> <li>• Less than 25%</li> <li>• 25% or more</li> </ul> <p>The percent of total revenue from Medicaid managed care contracts at the patient's health center was used as a proxy for potential incentives to provide more integrated care.</p> | 2013 Uniform Data System          |
| Urban/rural location of the health center                                                                              | Whether the health center is in a rural location (yes/no)                                                                                                                                                                                                                                                                                                                                                 | 2013 Uniform Data System          |
| <i>Predisposing factors</i>                                                                                            |                                                                                                                                                                                                                                                                                                                                                                                                           |                                   |
| Race/ethnicity                                                                                                         | <p>Race/ethnicity was categorized as:</p> <ul style="list-style-type: none"> <li>• Non-Hispanic White (reference)</li> <li>• Hispanic/Latino</li> <li>• Non-Hispanic Black</li> <li>• Other</li> </ul>                                                                                                                                                                                                    | 2014 Health Center Patient Survey |
| Gender                                                                                                                 | Gender was categorized as male (reference) and female                                                                                                                                                                                                                                                                                                                                                     | 2014 Health Center Patient Survey |
| Age                                                                                                                    | <p>Age was categorized as:</p> <ul style="list-style-type: none"> <li>• 18-25 years</li> <li>• 26-49 years (reference)</li> <li>• 50-64 years</li> </ul>                                                                                                                                                                                                                                                  | 2014 Health Center Patient Survey |
| Marital status                                                                                                         | <p>Marital status was categorized as:</p> <ul style="list-style-type: none"> <li>• Married or has a domestic partner (reference)</li> <li>• Not married or no domestic partner (never</li> </ul>                                                                                                                                                                                                          | 2014 Health Center Patient Survey |

|                                                       |                                                                                                                                                                                                                                                                                                                        |                                   |
|-------------------------------------------------------|------------------------------------------------------------------------------------------------------------------------------------------------------------------------------------------------------------------------------------------------------------------------------------------------------------------------|-----------------------------------|
|                                                       | married, separated, widowed, or divorced)                                                                                                                                                                                                                                                                              |                                   |
| Limited English proficiency                           | Limited English proficiency was dichotomized as no (reference) vs yes                                                                                                                                                                                                                                                  | 2014 Health Center Patient Survey |
| Education attainment                                  | Education attainment was categorized as: <ul style="list-style-type: none"> <li>• Less than high school (reference)</li> <li>• High school graduate</li> <li>• More than high school</li> </ul>                                                                                                                        | 2014 Health Center Patient Survey |
| Recommend health center to friends or family          | Recommending the health center to the patient's friends or family was categorized as: <ul style="list-style-type: none"> <li>• Would definitely recommend health center to family or friends (reference)</li> <li>• Would not recommend or would only somewhat recommend health center to family or friends</li> </ul> | 2014 Health Center Patient Survey |
| <i>Enabling factors</i>                               |                                                                                                                                                                                                                                                                                                                        |                                   |
| Poverty level                                         | Poverty level was categorized as: <ul style="list-style-type: none"> <li>• At or below the 100% federal poverty guideline vs. higher (reference)</li> </ul>                                                                                                                                                            | 2014 Health Center Patient Survey |
| Type of insurance                                     | Health insurance was categorized as: <ul style="list-style-type: none"> <li>• Medicaid</li> <li>• Uninsured (reference)</li> <li>• Other or missing response</li> </ul>                                                                                                                                                | 2014 Health Center Patient Survey |
| <i>Need factors</i>                                   |                                                                                                                                                                                                                                                                                                                        |                                   |
| Psychiatric distress                                  | Kessler 6 diagnostic tool <ul style="list-style-type: none"> <li>• Low (score less than 5, reference)</li> <li>• Moderate (score of 5-12)</li> <li>• Severe (Score of 13 or more)</li> </ul>                                                                                                                           | 2014 Health Center Patient Survey |
| Needed substance use disorder treatment or counseling | Patient reported wanting or needing substance use disorder treatment or counseling                                                                                                                                                                                                                                     | 2014 Health Center Patient Survey |
| Self-reported health status                           | Patient's self-reported health status categorized as: <ul style="list-style-type: none"> <li>• Excellent or very good</li> <li>• Good, fair or poor (reference)</li> </ul>                                                                                                                                             | 2014 Health Center Patient Survey |

**Appendix Table B1. Kessler 6 Diagnostic Tool**

| Kessler 6 Questions                                                                                                                                                                                                                                                                                                                                                                                                                                                                                                                                                                | Response Options                                                                                                                                                   | Diagnostic Criteria*                                                                                                                                         |
|------------------------------------------------------------------------------------------------------------------------------------------------------------------------------------------------------------------------------------------------------------------------------------------------------------------------------------------------------------------------------------------------------------------------------------------------------------------------------------------------------------------------------------------------------------------------------------|--------------------------------------------------------------------------------------------------------------------------------------------------------------------|--------------------------------------------------------------------------------------------------------------------------------------------------------------|
| <p>During the past 30 days, how often did you feel [....]?</p> <p>1. So sad that nothing could cheer you up?</p> <p>2. Nervous?</p> <p>3. Restless or fidgety?</p> <p>4. Hopeless?</p> <p>5. That everything was an effort?</p> <p>6. Worthless?</p>                                                                                                                                                                                                                                                                                                                               | <p>Response Options:</p> <p>a. All of the time</p> <p>b. Most of the time</p> <p>c. Some of the time</p> <p>d. A little of the time</p> <p>e. None of the time</p> | <p>Score less than 5: No psychological distress</p> <p>Score of 5-12: Moderate psychological distress</p> <p>Score of 13+: Severe psychological distress</p> |
| <p>Notes:</p> <p>* Diagnostic criteria based on analysis by Prochaska, Sung, Max, Shi &amp; Ong.(1)</p> <p>Appendix Table B1 shows the questions, response options, and diagnostic criteria for the Kessler 6 psychological distress scale. Although the original K6 scale was used to detect severe psychological distress at a score of 13 or higher, Prochaska et al. argued that this cutoff of 13 misses people who are still experiencing “clinically relevant” psychological distress and that a score of 5-12 was still indicative of moderate psychological distress.</p> |                                                                                                                                                                    |                                                                                                                                                              |

**Table C1: Association Between Mental Health (MH) Staffing and Patients Receiving Mental Health Treatment Anywhere within Last 12 Months (vs None) Weighted Multilevel GSEM Logistic Regression (n=4,575)**

|                                                                                                          | <i>OR</i> | <i>Robust SE</i> | <i>p-value</i> | <i>95% Confidence Interval</i> |      |
|----------------------------------------------------------------------------------------------------------|-----------|------------------|----------------|--------------------------------|------|
| <b>Any licensed mental health staff<br/>(ref: no mental health staff)</b>                                |           |                  |                |                                |      |
| <i>Less than 1 MH FTE per 2,000 patients</i>                                                             | 1.22      | 0.28             | 0.39           | 0.78                           | 1.92 |
| <i>At least 1 MH FTE per 2,000 patients</i>                                                              | 2.24*     | 0.88             | 0.04           | 1.04                           | 4.84 |
| <b>Health center</b>                                                                                     |           |                  |                |                                |      |
| Organizational capacity                                                                                  |           |                  |                |                                |      |
| PCP panel size<br>(ref: < 1,200 patients)                                                                |           |                  |                |                                |      |
| <i>1,200 – 1,999 patients</i>                                                                            | 0.62      | 0.16             | 0.07           | 0.38                           | 1.04 |
| <i>≥ 2,000 patients</i>                                                                                  | 0.66      | 0.22             | 0.20           | 0.34                           | 1.26 |
| Ratio of clinic support staff to PCP FTE<br>(ref: ≤2)                                                    |           |                  |                |                                |      |
| <i>&gt;2 - ≤4</i>                                                                                        | 1.17      | 0.24             | 0.44           | 0.78                           | 1.76 |
| <i>&gt; 4</i>                                                                                            | 1.39      | 0.40             | 0.25           | 0.79                           | 2.44 |
| Rural location                                                                                           | 0.99      | 0.18             | 0.96           | 0.69                           | 1.42 |
| Number of center’s clinic sites (ref: ≤10)                                                               |           |                  |                |                                |      |
| <i>11-19</i>                                                                                             | 0.81      | 0.16             | 0.31           | 0.55                           | 1.21 |
| <i>≥20</i>                                                                                               | 0.78      | 0.20             | 0.33           | 0.47                           | 1.29 |
| Demand for mental health services: % of patients at center with a diagnosis of depression<br>(ref: ≤ 5%) |           |                  |                |                                |      |
| <i>&gt; 5% - &lt; 15%</i>                                                                                | 2.07***   | 0.46             | 0.00           | 1.34                           | 3.21 |
| <i>≥15%</i>                                                                                              | 2.38**    | 0.84             | 0.01           | 1.19                           | 4.77 |
| Funding incentives for integrated care: % of total revenue from Medicaid managed care (ref: none)        |           |                  |                |                                |      |
| <i>&lt;25%</i>                                                                                           | 1.29      | 0.25             | 0.20           | 0.88                           | 1.90 |
| <i>≥25%</i>                                                                                              | 0.90      | 0.34             | 0.77           | 0.43                           | 1.87 |
| <b>Patients</b>                                                                                          |           |                  |                |                                |      |
| Predisposing factors                                                                                     |           |                  |                |                                |      |
| Female sex (ref: male)                                                                                   | 1.15      | 0.21             | 0.45           | 0.80                           | 1.65 |
| Age (ref: 26-49)                                                                                         |           |                  |                |                                |      |
| <i>18-25</i>                                                                                             | 0.66      | 0.18             | 0.13           | 0.39                           | 1.13 |
| <i>50-64</i>                                                                                             | 0.72*     | 0.11             | 0.03           | 0.53                           | 0.97 |
| Race/Ethnicity<br>(reference: non-Hispanic white)                                                        |           |                  |                |                                |      |
| <i>Hispanic/Latino</i>                                                                                   | 0.57**    | 0.13             | 0.01           | 0.36                           | 0.88 |
| <i>Non-Hispanic Black</i>                                                                                | 0.46***   | 0.10             | 0.00           | 0.31                           | 0.69 |
| <i>Other</i>                                                                                             | 0.75      | 0.17             | 0.21           | 0.48                           | 1.18 |
| Marital status: not married or domestic partner (ref: married or domestic partner)                       | 1.32      | 0.24             | 0.12           | 0.93                           | 1.87 |
| Education (ref: less than high school)                                                                   |           |                  |                |                                |      |
| <i>High school graduate</i>                                                                              | 0.99      | 0.17             | 0.97           | 0.71                           | 1.39 |

|                                                                                                                                                                                                                                                                                                                  |          |               |      |      |       |
|------------------------------------------------------------------------------------------------------------------------------------------------------------------------------------------------------------------------------------------------------------------------------------------------------------------|----------|---------------|------|------|-------|
| <i>More than high school</i>                                                                                                                                                                                                                                                                                     | 1.65**   | 0.30          | 0.01 | 1.15 | 2.35  |
| Limited English proficiency (ref. no limited English proficiency)                                                                                                                                                                                                                                                | 0.35***  | 0.11          | 0.00 | 0.19 | 0.65  |
| Would not or only somewhat recommend HC to family or friends (ref: would definitely recommend)                                                                                                                                                                                                                   | 0.86     | 0.18          | 0.45 | 0.57 | 1.28  |
| Enabling factors                                                                                                                                                                                                                                                                                                 |          |               |      |      |       |
| Federal poverty level less than or equal to 100% (ref: greater than 100%)                                                                                                                                                                                                                                        | 1.16     | 0.20          | 0.40 | 0.82 | 1.64  |
| Insurance coverage status (ref: uninsured)                                                                                                                                                                                                                                                                       |          |               |      |      |       |
| <i>Medicaid</i>                                                                                                                                                                                                                                                                                                  | 2.88***  | 0.59          | 0.00 | 1.93 | 4.30  |
| <i>Other or missing response</i>                                                                                                                                                                                                                                                                                 | 1.49     | 0.35          | 0.09 | 0.94 | 2.35  |
| Need factors                                                                                                                                                                                                                                                                                                     |          |               |      |      |       |
| MH Status by Kessler severity score (ref: mild or no psychological distress)                                                                                                                                                                                                                                     |          |               |      |      |       |
| <i>Moderate psychological distress</i>                                                                                                                                                                                                                                                                           | 3.55***  | 0.64          | 0.00 | 2.48 | 5.06  |
| <i>Severe psychological distress</i>                                                                                                                                                                                                                                                                             | 11.22*** | 2.69          | 0.00 | 7.02 | 17.94 |
| Reported last year wanting or needing substance abuse treatment or counseling (ref.: did not report)                                                                                                                                                                                                             | 5.40***  | 1.26          | 0.00 | 3.42 | 8.52  |
| Excellent or very good self-reported health (ref: good, fair, poor health)                                                                                                                                                                                                                                       | 0.73     | 0.16          | 0.15 | 0.48 | 1.12  |
| M1[grantee_id]                                                                                                                                                                                                                                                                                                   | 2.72     | (constrained) |      |      |       |
| constant                                                                                                                                                                                                                                                                                                         | 0.03     | 0.02          | 0.00 | 0.01 | 0.08  |
| var(M1[grantee_id])                                                                                                                                                                                                                                                                                              | 2.19     | 1.18          |      | 1.67 | 3.31  |
| Notes:<br>Source: Uniform Data System 2013 and Health Resources and Services Administration Health Center Patient Survey 2014<br>GSEM = Generalized Structural Equation Model<br>MH = Mental Health, FTE= Full Time Equivalent, HC = Health Center<br>Statistically significant at *p<0.05; **p<0.01; ***p<0.001 |          |               |      |      |       |

**Table C2: Association Between Type of Mental Health (MH) Staff and Patients Receiving Mental Health Treatment Anywhere within Last 12 Months (vs None) Weighted Multilevel GSEM Logistic Regression (n=4,575)**

|                                                                                                       | <i>OR</i> | <i>Robust SE</i> | <i>p-value</i> | <i>95% Confidence Interval</i> |      |
|-------------------------------------------------------------------------------------------------------|-----------|------------------|----------------|--------------------------------|------|
| <b>Type of mental health staff</b>                                                                    |           |                  |                |                                |      |
| Any psychiatrist FTE on staff (ref. none)                                                             | 1.21      | 0.26             | 0.38           | 0.80                           | 1.83 |
| Any clinical psychologist FTE on staff (ref. none)                                                    | 0.95      | 0.19             | 0.82           | 0.64                           | 1.42 |
| Any other licensed MH provider FTE on staff (ref. none)                                               | 0.99      | 0.28             | 0.98           | 0.57                           | 1.74 |
| <b>Health center</b>                                                                                  |           |                  |                |                                |      |
| Organizational capacity                                                                               |           |                  |                |                                |      |
| PCP panel size (ref: < 1,200 patients)                                                                |           |                  |                |                                |      |
| 1,200 – 1,999 patients                                                                                | 0.59      | 0.16             | 0.05           | 0.35                           | 0.99 |
| ≥ 2,000 patients                                                                                      | 0.61      | 0.20             | 0.14           | 0.32                           | 1.17 |
| Ratio of clinic support staff to PCP FTE (ref: ≤2)                                                    |           |                  |                |                                |      |
| >2 - ≤4                                                                                               | 1.15      | 0.24             | 0.51           | 0.76                           | 1.74 |
| > 4                                                                                                   | 1.29      | 0.38             | 0.39           | 0.72                           | 2.29 |
| Rural location                                                                                        | 0.99      | 0.20             | 0.95           | 0.67                           | 1.46 |
| Number of center’s clinic sites (ref: ≤10)                                                            |           |                  |                |                                |      |
| 11-19                                                                                                 | 0.82      | 0.17             | 0.34           | 0.54                           | 1.23 |
| ≥20                                                                                                   | 0.84      | 0.23             | 0.53           | 0.49                           | 1.44 |
| Demand for mental health services: % of patients at center with a diagnosis of depression (ref: ≤ 5%) |           |                  |                |                                |      |
| > 5% - < 15%                                                                                          | 2.18***   | 0.51             | 0.00           | 1.38                           | 3.46 |
| ≥15%                                                                                                  | 2.80**    | 1.09             | 0.01           | 1.31                           | 6.00 |
| Funding incentives for integrated care: % of total revenue from Medicaid managed care (ref: none)     |           |                  |                |                                |      |
| <25%                                                                                                  | 1.31      | 0.27             | 0.19           | 0.88                           | 1.95 |
| ≥25%                                                                                                  | 0.85      | 0.32             | 0.66           | 0.40                           | 1.78 |
| <b>Patients</b>                                                                                       |           |                  |                |                                |      |
| Predisposing factors                                                                                  |           |                  |                |                                |      |
| Female sex (ref: male)                                                                                | 1.14      | 0.21             | 0.48           | 0.79                           | 1.64 |
| Age (ref: 26-49)                                                                                      |           |                  |                |                                |      |
| 18-25                                                                                                 | 0.66      | 0.18             | 0.12           | 0.38                           | 1.12 |
| 50-64                                                                                                 | 0.71*     | 0.11             | 0.03           | 0.53                           | 0.97 |
| Race/Ethnicity (reference: non-Hispanic white)                                                        |           |                  |                |                                |      |
| Hispanic/Latino                                                                                       | 0.57**    | 0.13             | 0.01           | 0.36                           | 0.89 |
| Non-Hispanic Black                                                                                    | 0.46***   | 0.09             | 0.00           | 0.31                           | 0.69 |
| Other                                                                                                 | 0.76      | 0.18             | 0.23           | 0.48                           | 1.19 |



|                                                                                                      |          |               |      |      |       |
|------------------------------------------------------------------------------------------------------|----------|---------------|------|------|-------|
| Marital status: not married or domestic partner (ref: married or domestic partner)                   | 1.31     | 0.24          | 0.13 | 0.92 | 1.87  |
| Education (ref: less than high school)                                                               |          |               |      |      |       |
| <i>High school graduate</i>                                                                          | 1.00     | 0.17          | 1.00 | 0.72 | 1.40  |
| <i>More than high school</i>                                                                         | 1.66**   | 0.30          | 0.01 | 1.16 | 2.37  |
| Limited English proficiency (ref. no limited English proficiency)                                    | 0.35***  | 0.11          | 0.00 | 0.19 | 0.65  |
| Would not or only somewhat recommend HC to family or friends (ref: would definitely recommend)       | 0.85     | 0.17          | 0.44 | 0.57 | 1.27  |
| Enabling factors                                                                                     |          |               |      |      |       |
| Federal poverty level less than or equal to 100% (ref: greater than 100%)                            | 1.16     | 0.20          | 0.40 | 0.82 | 1.64  |
| Insurance coverage status (ref: uninsured)                                                           |          |               |      |      |       |
| <i>Medicaid</i>                                                                                      | 2.88***  | 0.59          | 0.00 | 1.92 | 4.31  |
| <i>Other or missing response</i>                                                                     | 1.48     | 0.35          | 0.09 | 0.94 | 2.35  |
| Need factors                                                                                         |          |               |      |      |       |
| MH Status by Kessler severity score (ref: mild or no psychological distress)                         |          |               |      |      |       |
| <i>Moderate psychological distress</i>                                                               | 3.57***  | 0.65          | 0.00 | 2.50 | 5.10  |
| <i>Severe psychological distress</i>                                                                 | 11.25*** | 2.69          | 0.00 | 7.04 | 17.98 |
| Reported last year wanting or needing substance abuse treatment or counseling (ref.: did not report) | 5.40***  | 1.26          | 0.00 | 3.42 | 8.53  |
| Excellent or very good self-reported health (ref: good, fair, poor health)                           | 0.74     | 0.16          | 0.17 | 0.49 | 1.13  |
| M1[grantee_id]                                                                                       | 2.72     | (constrained) |      |      |       |
| constant                                                                                             | 0.04     | 0.02          | 0.00 | 0.01 | 0.10  |
| var(M1[grantee_id])                                                                                  | 2.26     | 1.20          |      | 1.68 | 3.56  |

Notes:

Source: Uniform Data System 2013 and Health Resources and Services Administration Health Center Patient Survey 2014

GSEM = Generalized Structural Equation Model

MH = Mental Health, FTE= Full Time Equivalent, HC = Health Center

Statistically significant at \*p<0.05; \*\*p<0.01; \*\*\*p<0.001

**Table D1: Association Between Mental Health (MH) Staffing and At Least Some On-Site Patient Utilization of Mental Health Services (vs All Off-Site) Weighted Multilevel GSEM Logistic Regression (n=1,130)**

|                                                                                                             | <i>OR</i> | <i>Robust SE</i> | <i>p-value</i> | <i>95% Confidence Interval</i> |       |
|-------------------------------------------------------------------------------------------------------------|-----------|------------------|----------------|--------------------------------|-------|
| <b>Any licensed mental health staff<br/>(ref: no mental health staff)</b>                                   |           |                  |                |                                |       |
| <i>Less than 1 MH FTE per 2,000 patients</i>                                                                | 4.50***   | 2.19             | 0.00           | 1.73                           | 11.70 |
| <i>At least 1 MH FTE per 2,000 patients</i>                                                                 | 13.48***  | 9.74             | 0.00           | 3.27                           | 55.54 |
| <b>Health center</b>                                                                                        |           |                  |                |                                |       |
| Organizational capacity                                                                                     |           |                  |                |                                |       |
| PCP panel size<br>(ref: < 1,200 patients)                                                                   |           |                  |                |                                |       |
| <i>1,200 – 1,999 patients</i>                                                                               | 0.59      | 0.24             | 0.19           | 0.27                           | 1.30  |
| <i>≥ 2,000 patients</i>                                                                                     | 0.56      | 0.31             | 0.30           | 0.19                           | 1.67  |
| Ratio of clinic support staff to PCP<br>FTE (ref: ≤2)                                                       |           |                  |                |                                |       |
| <i>&gt;2 - ≤4</i>                                                                                           | 0.66      | 0.27             | 0.30           | 0.30                           | 1.46  |
| <i>&gt; 4</i>                                                                                               | 1.32      | 0.84             | 0.66           | 0.38                           | 4.57  |
| Rural location                                                                                              | 2.04      | 0.78             | 0.06           | 0.97                           | 4.30  |
| Number of center’s clinic sites (ref:<br>≤10)                                                               |           |                  |                |                                |       |
| <i>11-19</i>                                                                                                | 1.28      | 0.48             | 0.50           | 0.62                           | 2.67  |
| <i>≥20</i>                                                                                                  | 1.80      | 0.81             | 0.19           | 0.74                           | 4.35  |
| Demand for mental health services: % of<br>patients at center with a diagnosis of<br>depression (ref: ≤ 5%) |           |                  |                |                                |       |
| <i>&gt; 5% - &lt; 15%</i>                                                                                   | 1.21      | 0.49             | 0.64           | 0.54                           | 2.68  |
| <i>≥15%</i>                                                                                                 | 2.21      | 1.21             | 0.15           | 0.76                           | 6.48  |
| Funding incentives for integrated care: % of<br>total revenue from Medicaid managed care<br>(ref: none)     |           |                  |                |                                |       |
| <i>&lt;25%</i>                                                                                              | 0.87      | 0.30             | 0.68           | 0.45                           | 1.69  |
| <i>≥25%</i>                                                                                                 | 0.93      | 0.52             | 0.89           | 0.31                           | 2.76  |
| <b>Patients</b>                                                                                             |           |                  |                |                                |       |
| Predisposing factors                                                                                        |           |                  |                |                                |       |
| Female sex (ref: male)                                                                                      | 1.46      | 0.37             | 0.14           | 0.89                           | 2.38  |
| Age (ref: 26-49)                                                                                            |           |                  |                |                                |       |
| <i>18-25</i>                                                                                                | 0.25***   | 0.11             | 0.00           | 0.10                           | 0.60  |
| <i>50-64</i>                                                                                                | 0.90      | 0.28             | 0.74           | 0.49                           | 1.67  |
| Race/Ethnicity<br>(reference: non-Hispanic white)                                                           |           |                  |                |                                |       |
| <i>Hispanic/Latino</i>                                                                                      | 2.01*     | 0.62             | 0.02           | 1.10                           | 3.67  |
| <i>Non-Hispanic Black</i>                                                                                   | 1.47      | 0.47             | 0.23           | 0.78                           | 2.76  |
| <i>Other</i>                                                                                                | 3.77**    | 1.83             | 0.01           | 1.45                           | 9.78  |
| Marital status: not married or<br>domestic partner (ref: married or<br>domestic partner)                    | 0.90      | 0.28             | 0.73           | 0.49                           | 1.64  |
| Education (ref: less than high school)                                                                      |           |                  |                |                                |       |
| <i>High school graduate</i>                                                                                 | 1.18      | 0.39             | 0.62           | 0.61                           | 2.27  |

|                                                                                                                                                                                                                                                                                                                  |         |               |      |      |       |
|------------------------------------------------------------------------------------------------------------------------------------------------------------------------------------------------------------------------------------------------------------------------------------------------------------------|---------|---------------|------|------|-------|
| <i>More than high school</i>                                                                                                                                                                                                                                                                                     | 1.14    | 0.36          | 0.67 | 0.62 | 2.12  |
| Limited English proficiency (ref. no limited English proficiency)                                                                                                                                                                                                                                                | 4.31**  | 2.41          | 0.01 | 1.44 | 12.88 |
| Would not or only somewhat recommend HC to family or friends (ref: would definitely recommend)                                                                                                                                                                                                                   | 0.21*** | 0.07          | 0.00 | 0.12 | 0.39  |
| Enabling factors                                                                                                                                                                                                                                                                                                 |         |               |      |      |       |
| Federal poverty level less than or equal to 100% (ref: greater than 100%)                                                                                                                                                                                                                                        | 0.57*   | 0.16          | 0.04 | 0.34 | 0.98  |
| Insurance coverage status (ref: uninsured)                                                                                                                                                                                                                                                                       |         |               |      |      |       |
| <i>Medicaid</i>                                                                                                                                                                                                                                                                                                  | 0.90    | 0.34          | 0.77 | 0.42 | 1.89  |
| <i>Other or missing response</i>                                                                                                                                                                                                                                                                                 | 1.53    | 0.78          | 0.40 | 0.57 | 4.16  |
| Need factors                                                                                                                                                                                                                                                                                                     |         |               |      |      |       |
| MH Status by Kessler severity score (ref: mild or no psychological distress)                                                                                                                                                                                                                                     |         |               |      |      |       |
| <i>Moderate psychological distress</i>                                                                                                                                                                                                                                                                           | 1.35    | 0.49          | 0.42 | 0.66 | 2.75  |
| <i>Severe psychological distress</i>                                                                                                                                                                                                                                                                             | 2.66**  | 1.04          | 0.01 | 1.23 | 5.73  |
| Reported last year wanting or needing substance abuse treatment or counseling (ref.: did not report)                                                                                                                                                                                                             | 0.64    | 0.21          | 0.18 | 0.33 | 1.23  |
| Excellent or very good self-reported health (ref: good, fair, poor health)                                                                                                                                                                                                                                       | 0.39*   | 0.15          | 0.02 | 0.18 | 0.84  |
| M1[grantee_id]                                                                                                                                                                                                                                                                                                   | 2.72    | (constrained) |      |      |       |
| constant                                                                                                                                                                                                                                                                                                         | 0.19    | 0.16          | 0.06 | 0.03 | 1.04  |
| var(M1[grantee_id])                                                                                                                                                                                                                                                                                              | 7.47    | 1.66          |      | 3.42 | 26.78 |
| Notes:<br>Source: Uniform Data System 2013 and Health Resources and Services Administration Health Center Patient Survey 2014<br>GSEM = Generalized Structural Equation Model<br>MH = Mental Health, FTE= Full Time Equivalent, HC = Health Center<br>Statistically significant at *p<0.05; **p<0.01; ***p<0.001 |         |               |      |      |       |

**Table D2: Association Between Type of Mental Health (MH) Staff and At Least Some On Site Patient Utilization of Mental Health Services (vs All Off Site) Weighted Multilevel GSEM Logistic Regression (n=1,130)**

|                                                                                                       | <i>OR</i> | <i>Robust SE</i> | <i>p-value</i> | <i>95% Confidence Interval</i> |       |
|-------------------------------------------------------------------------------------------------------|-----------|------------------|----------------|--------------------------------|-------|
| <b>Type of mental health staff</b>                                                                    |           |                  |                |                                |       |
| Any psychiatrist FTE on staff (ref. none)                                                             | 3.31***   | 1.37             | 0.00           | 1.47                           | 7.46  |
| Any clinical psychologist FTE on staff (ref. none)                                                    | 1.03      | 0.35             | 0.94           | 0.53                           | 1.99  |
| Any other licensed MH provider FTE on staff (ref. none)                                               | 1.89      | 0.80             | 0.13           | 0.82                           | 4.33  |
| <b>Health center</b>                                                                                  |           |                  |                |                                |       |
| Organizational capacity                                                                               |           |                  |                |                                |       |
| PCP panel size (ref: < 1,200 patients)                                                                |           |                  |                |                                |       |
| 1,200 – 1,999 patients                                                                                | 0.52      | 0.21             | 0.11           | 0.23                           | 1.17  |
| ≥ 2,000 patients                                                                                      | 0.44      | 0.26             | 0.16           | 0.14                           | 1.38  |
| Ratio of clinic support staff to PCP FTE (ref: ≤2)                                                    |           |                  |                |                                |       |
| >2 - ≤4                                                                                               | 0.55      | 0.23             | 0.16           | 0.24                           | 1.27  |
| > 4                                                                                                   | 0.83      | 0.57             | 0.78           | 0.21                           | 3.19  |
| Rural location                                                                                        | 2.19      | 0.88             | 0.05           | 1.00                           | 4.80  |
| Number of center's clinic sites (ref: ≤10)                                                            |           |                  |                |                                |       |
| 11-19                                                                                                 | 1.25      | 0.48             | 0.57           | 0.58                           | 2.66  |
| ≥20                                                                                                   | 1.53      | 0.72             | 0.37           | 0.61                           | 3.85  |
| Demand for mental health services: % of patients at center with a diagnosis of depression (ref: ≤ 5%) |           |                  |                |                                |       |
| > 5% - < 15%                                                                                          | 1.20      | 0.50             | 0.66           | 0.53                           | 2.73  |
| ≥15%                                                                                                  | 2.48      | 1.29             | 0.08           | 0.89                           | 6.86  |
| Funding incentives for integrated care: % of total revenue from Medicaid managed care (ref: none)     |           |                  |                |                                |       |
| <25%                                                                                                  | 0.99      | 0.35             | 0.98           | 0.50                           | 1.97  |
| ≥25%                                                                                                  | 0.78      | 0.43             | 0.65           | 0.27                           | 2.30  |
| <b>Patients</b>                                                                                       |           |                  |                |                                |       |
| Predisposing factors                                                                                  |           |                  |                |                                |       |
| Female sex (ref: male)                                                                                | 1.46      | 0.37             | 0.14           | 0.89                           | 2.41  |
| Age (ref: 26-49)                                                                                      |           |                  |                |                                |       |
| 18-25                                                                                                 | 0.24***   | 0.11             | 0.00           | 0.10                           | 0.57  |
| 50-64                                                                                                 | 0.88      | 0.28             | 0.70           | 0.48                           | 1.64  |
| Race/Ethnicity (reference: non-Hispanic white)                                                        |           |                  |                |                                |       |
| Hispanic/Latino                                                                                       | 2.04*     | 0.63             | 0.02           | 1.12                           | 3.73  |
| Non-Hispanic Black                                                                                    | 1.47      | 0.48             | 0.24           | 0.78                           | 2.78  |
| Other                                                                                                 | 3.92***   | 1.88             | 0.00           | 1.53                           | 10.02 |

|                                                                                                      |         |               |      |      |       |
|------------------------------------------------------------------------------------------------------|---------|---------------|------|------|-------|
| Marital status: not married or domestic partner (ref: married or domestic partner)                   | 0.89    | 0.28          | 0.72 | 0.49 | 1.64  |
| Education (ref: less than high school)                                                               |         |               |      |      |       |
| <i>High school graduate</i>                                                                          | 1.22    | 0.41          | 0.56 | 0.62 | 2.37  |
| <i>More than high school</i>                                                                         | 1.14    | 0.36          | 0.68 | 0.61 | 2.12  |
| Limited English proficiency (ref. no limited English proficiency)                                    | 3.89*   | 2.17          | 0.02 | 1.30 | 11.61 |
| Would not or only somewhat recommend HC to family or friends (ref: would definitely recommend)       | 0.20*** | 0.06          | 0.00 | 0.11 | 0.38  |
| Enabling factors                                                                                     |         |               |      |      |       |
| Federal poverty level less than or equal to 100% (ref: greater than 100%)                            | 0.59    | 0.16          | 0.05 | 0.34 | 1.00  |
| Insurance coverage status (ref: uninsured)                                                           |         |               |      |      |       |
| <i>Medicaid</i>                                                                                      | 0.84    | 0.33          | 0.66 | 0.39 | 1.81  |
| <i>Other or missing response</i>                                                                     | 1.45    | 0.74          | 0.46 | 0.54 | 3.94  |
| Need factors                                                                                         |         |               |      |      |       |
| MH Status by Kessler severity score (ref: mild or no psychological distress)                         |         |               |      |      |       |
| <i>Moderate psychological distress</i>                                                               | 1.33    | 0.49          | 0.43 | 0.65 | 2.74  |
| <i>Severe psychological distress</i>                                                                 | 2.53*   | 1.00          | 0.02 | 1.17 | 5.47  |
| Reported last year wanting or needing substance abuse treatment or counseling (ref.: did not report) | 0.63    | 0.21          | 0.18 | 0.33 | 1.23  |
| Excellent or very good self-reported health (ref: good, fair, poor health)                           | 0.39*   | 0.15          | 0.02 | 0.18 | 0.83  |
| M1[grantee_id]                                                                                       | 2.72    | (constrained) |      |      |       |
| constant                                                                                             | 0.36    | 0.32          | 0.24 | 0.06 | 2.02  |
| var(M1[grantee_id])                                                                                  | 8.54    | 1.66          |      | 3.84 | 30.46 |

Notes:

Source: Uniform Data System 2013 and Health Resources and Services Administration Health Center Patient Survey 2014

GSEM = Generalized Structural Equation Model

MH = Mental Health, FTE= Full Time Equivalent, HC = Health Center

Statistically significant at \*p<0.05; \*\*p<0.01; \*\*\*p<0.001





|                                                                                                                                                                                                                                                                                                                  |              |      |              |              |      |              |              |      |              |              |      |              |              |      |      |
|------------------------------------------------------------------------------------------------------------------------------------------------------------------------------------------------------------------------------------------------------------------------------------------------------------------|--------------|------|--------------|--------------|------|--------------|--------------|------|--------------|--------------|------|--------------|--------------|------|------|
| <i>Medicaid</i>                                                                                                                                                                                                                                                                                                  | 2.878<br>*** | 0.59 | 0.00         | 3.029<br>*** | 0.67 | 0.00         | 3.386<br>*** | 0.96 | 0.00         | 2.972<br>*** | 0.74 | 0.00         | 3.695<br>*** | 1.32 | 0.00 |
| <i>Other or missing response</i>                                                                                                                                                                                                                                                                                 | 1.49         | 0.35 | 0.09         | 1.45         | 0.39 | 0.17         | 1.94         | 0.69 | 0.06         | 1.70         | 0.48 | 0.06         | 1.54         | 0.71 | 0.36 |
| Need factors                                                                                                                                                                                                                                                                                                     |              |      |              |              |      |              |              |      |              |              |      |              |              |      |      |
| MH Status by Kessler severity score (ref: mild or no psychological distress)                                                                                                                                                                                                                                     |              |      |              |              |      |              |              |      |              |              |      |              |              |      |      |
| <i>Moderate psychological distress</i>                                                                                                                                                                                                                                                                           | 3.546<br>*** | 0.64 | 0.00         | 3.517<br>*** | 0.64 | 0.00         |              |      |              |              |      |              |              |      |      |
| <i>Severe psychological distress</i>                                                                                                                                                                                                                                                                             | 11.22<br>*** | 2.69 | 0.00         |              |      |              |              |      |              | 3.495<br>*** | 0.79 | 0.00         |              |      |      |
| Reported last year wanting or needing substance abuse treatment or counseling (ref.: did not report)                                                                                                                                                                                                             | 1.26         | 0.00 | 5.891<br>*** | 1.62         | 0.00 | 8.737<br>*** | 3.34         | 0.00 | 6.448<br>*** | 1.82         | 0.00 | 5.864<br>*** | 2.97         | 0.00 | 0.00 |
| Excellent or very good self-reported health (ref: good, fair, poor health)                                                                                                                                                                                                                                       | 0.16         | 0.15 | 0.84         | 0.18         | 0.43 | 0.67         | 0.22         | 0.23 | 0.521<br>*   | 0.15         | 0.03 | 0.44         | 0.25         | 0.14 | 0.15 |
| M1[grantee_id]                                                                                                                                                                                                                                                                                                   | 2.72         |      |              | 2.72         |      |              | 2.72         |      |              | 2.72         |      |              | 2.72         |      |      |
| var(M1[grantee_id])                                                                                                                                                                                                                                                                                              | 2.191<br>*** | 0.37 | 0.00         | 2.442<br>*** | 0.50 | 0.00         | 4.825<br>*** | 1.94 | 0.00         | 3.477<br>*** | 0.95 | 0.00         | 4.734<br>**  | 2.57 | 0.00 |
| Notes:<br>Source: Uniform Data System 2013 and Health Resources and Services Administration Health Center Patient Survey 2014<br>GSEM = Generalized Structural Equation Model<br>MH = Mental Health, FTE= Full Time Equivalent, HC = Health Center<br>Statistically significant at *p<0.05; **p<0.01; ***p<0.001 |              |      |              |              |      |              |              |      |              |              |      |              |              |      |      |



**Table E2: Association Between Mental Health (MH) Staffing and Patients Receiving Any MH Treatment within Last 12 Months (vs None) Stratified Sample Analysis**

|                                                                                                       | Entire Sample |                  |                | Patients with Depression or Generalized Anxiety |                  |                | Patients with Panic Disorder, Schizophrenia, or Bipolar Disorder |                  |                |
|-------------------------------------------------------------------------------------------------------|---------------|------------------|----------------|-------------------------------------------------|------------------|----------------|------------------------------------------------------------------|------------------|----------------|
|                                                                                                       | n=4,575       |                  |                | n=2,071                                         |                  |                | n=1,013                                                          |                  |                |
|                                                                                                       | <i>OR</i>     | <i>Robust SE</i> | <i>p-value</i> | <i>OR</i>                                       | <i>Robust SE</i> | <i>p-value</i> | <i>OR</i>                                                        | <i>Robust SE</i> | <i>p-value</i> |
| <b>Any licensed mental health staff (ref: no mental health staff)</b>                                 |               |                  |                |                                                 |                  |                |                                                                  |                  |                |
| <i>Less than 1 MH FTE per 2,000 patients</i>                                                          | 1.22          | 0.28             | 0.39           | 1.30                                            | 0.34             | 0.31           | 2.11                                                             | 0.93             | 0.09           |
| <i>At least 1 MH FTE per 2,000 patients</i>                                                           | 2.242*        | 0.88             | 0.04           | 2.550*                                          | 1.11             | 0.03           | 3.37                                                             | 2.30             | 0.07           |
| <b>Health center</b>                                                                                  |               |                  |                |                                                 |                  |                |                                                                  |                  |                |
| Organizational capacity                                                                               |               |                  |                |                                                 |                  |                |                                                                  |                  |                |
| PCP panel size (ref: < 1,200 patients)                                                                |               |                  |                |                                                 |                  |                |                                                                  |                  |                |
| <i>1,200 – 1,999 patients</i>                                                                         | 0.62          | 0.16             | 0.07           | 0.80                                            | 0.22             | 0.41           | 0.67                                                             | 0.27             | 0.33           |
| <i>≥ 2,000 patients</i>                                                                               | 0.66          | 0.22             | 0.20           | 0.80                                            | 0.29             | 0.54           | 0.65                                                             | 0.35             | 0.43           |
| Ratio of clinic support staff to PCP FTE (ref: ≤2)                                                    |               |                  |                |                                                 |                  |                |                                                                  |                  |                |
| <i>&gt;2 - ≤4</i>                                                                                     | 1.17          | 0.24             | 0.44           | 1.31                                            | 0.30             | 0.25           | 1.05                                                             | 0.43             | 0.91           |
| <i>&gt; 4</i>                                                                                         | 1.39          | 0.40             | 0.25           | 1.55                                            | 0.55             | 0.22           | 1.59                                                             | 0.98             | 0.46           |
| Rural location                                                                                        | 0.99          | 0.18             | 0.96           | 0.87                                            | 0.18             | 0.50           | 0.91                                                             | 0.29             | 0.76           |
| Number of center’s clinic sites (ref: ≤10)                                                            |               |                  |                |                                                 |                  |                |                                                                  |                  |                |
| <i>11-19</i>                                                                                          | 0.82          | 0.16             | 0.31           | 0.90                                            | 0.21             | 0.64           | 0.74                                                             | 0.29             | 0.43           |
| <i>≥20</i>                                                                                            | 0.78          | 0.20             | 0.33           | 0.86                                            | 0.27             | 0.63           | 0.64                                                             | 0.31             | 0.37           |
| Demand for mental health services: % of patients at center with a diagnosis of depression (ref: ≤ 5%) |               |                  |                |                                                 |                  |                |                                                                  |                  |                |
| <i>&gt; 5% - &lt; 15%</i>                                                                             | 2.074**       | 0.46             | 0.00           | 1.866*                                          | 0.45             | 0.01           | 1.75                                                             | 0.65             | 0.13           |
| <i>≥15%</i>                                                                                           | 2.383*        | 0.84             | 0.01           | 1.94                                            | 0.71             | 0.07           | 1.12                                                             | 0.73             | 0.87           |
| Funding incentives for integrated care: % of total revenue from Medicaid managed care (ref: none)     |               |                  |                |                                                 |                  |                |                                                                  |                  |                |
| <i>&lt;25%</i>                                                                                        | 1.29          | 0.25             | 0.20           | 1.38                                            | 0.32             | 0.16           | 1.71                                                             | 0.62             | 0.14           |
| <i>≥25%</i>                                                                                           | 0.90          | 0.34             | 0.77           | 0.89                                            | 0.38             | 0.78           | 1.31                                                             | 0.99             | 0.72           |
| <b>Patients</b>                                                                                       |               |                  |                |                                                 |                  |                |                                                                  |                  |                |
| Predisposing factors                                                                                  |               |                  |                |                                                 |                  |                |                                                                  |                  |                |
| Female sex (ref: male)                                                                                | 1.15          | 0.21             | 0.45           | 0.81                                            | 0.15             | 0.26           | 1.12                                                             | 0.31             | 0.67           |

|                                                                                                      |              |      |      |              |      |      |              |      |      |
|------------------------------------------------------------------------------------------------------|--------------|------|------|--------------|------|------|--------------|------|------|
| Age (ref: 26-49)                                                                                     |              |      |      |              |      |      |              |      |      |
| 18-25                                                                                                | 0.66         | 0.18 | 0.13 | 0.64         | 0.21 | 0.18 | 1.16         | 0.61 | 0.78 |
| 50-64                                                                                                | 0.716*       | 0.11 | 0.03 | 0.627**      | 0.11 | 0.01 | 0.78         | 0.24 | 0.43 |
| Race/Ethnicity<br>(reference: non-Hispanic white)                                                    |              |      |      |              |      |      |              |      |      |
| Hispanic/Latino                                                                                      | 0.566*       | 0.13 | 0.01 | 0.72         | 0.22 | 0.28 | 0.88         | 0.49 | 0.82 |
| Non-Hispanic Black                                                                                   | 0.463**<br>* | 0.10 | 0.00 | 0.77         | 0.19 | 0.28 | 0.84         | 0.29 | 0.63 |
| Other                                                                                                | 0.75         | 0.17 | 0.21 | 1.31         | 0.34 | 0.30 | 2.12         | 1.02 | 0.12 |
| Marital status: not married or domestic partner (ref: married or domestic partner)                   | 1.32         | 0.24 | 0.12 | 1.28         | 0.25 | 0.22 | 1.05         | 0.28 | 0.87 |
| Education (ref: less than high school)                                                               |              |      |      |              |      |      |              |      |      |
| High school graduate                                                                                 | 0.99         | 0.17 | 0.97 | 1.31         | 0.26 | 0.18 | 0.66         | 0.25 | 0.28 |
| More than high school                                                                                | 1.646**      | 0.30 | 0.01 | 1.752*       | 0.40 | 0.02 | 1.31         | 0.52 | 0.50 |
| Limited English proficiency (ref. no limited English proficiency)                                    | 0.355**<br>* | 0.11 | 0.00 | 0.462*       | 0.18 | 0.04 | 0.276*       | 0.17 | 0.03 |
| Would not or only somewhat recommend HC to family or friends (ref: would definitely recommend)       | 0.86         | 0.18 | 0.45 | 0.94         | 0.21 | 0.77 | 0.90         | 0.32 | 0.76 |
| Enabling factors                                                                                     |              |      |      |              |      |      |              |      |      |
| Federal poverty level less than or equal to 100% (ref: greater than 100%)                            | 1.16         | 0.21 | 0.40 | 1.09         | 0.20 | 0.62 | 1.29         | 0.36 | 0.36 |
| Insurance coverage status (ref: uninsured)                                                           |              |      |      |              |      |      |              |      |      |
| Medicaid                                                                                             | 2.878**<br>* | 0.59 | 0.00 | 2.907**<br>* | 0.74 | 0.00 | 3.726**<br>* | 1.33 | 0.00 |
| Other or missing response                                                                            | 1.49         | 0.35 | 0.09 | 1.83         | 0.57 | 0.05 | 1.26         | 0.54 | 0.59 |
| Need factors                                                                                         |              |      |      |              |      |      |              |      |      |
| MH Status by Kessler severity score (ref: mild or no psychological distress)                         |              |      |      |              |      |      |              |      |      |
| Moderate psychological distress                                                                      | 3.546**<br>* | 0.64 | 0.00 | 1.680*       | 0.36 | 0.01 | 1.59         | 0.61 | 0.23 |
| Severe psychological distress                                                                        | 11.22**<br>* | 2.69 | 0.00 | 3.405**<br>* | 0.93 | 0.00 | 2.996**      | 1.11 | 0.00 |
| Reported last year wanting or needing substance abuse treatment or counseling (ref.: did not report) | 5.401**<br>* | 1.26 | 0.00 | 3.782**<br>* | 1.09 | 0.00 | 7.233**<br>* | 3.52 | 0.00 |
| Excellent or very good self-reported health (ref: good, fair, poor health)                           | 0.73         | 0.16 | 0.15 | 1.18         | 0.39 | 0.61 | 1.22         | 0.54 | 0.65 |
| M1[grantee_id]                                                                                       | 2.72         |      |      | 2.72         |      |      | 2.72         |      |      |

|                     |              |      |      |              |      |      |              |      |      |
|---------------------|--------------|------|------|--------------|------|------|--------------|------|------|
| var(M1[grantee_id]) | 2.191**<br>* | 0.37 | 0.00 | 2.391**<br>* | 0.59 | 0.00 | 5.248**<br>* | 2.09 | 0.00 |
|---------------------|--------------|------|------|--------------|------|------|--------------|------|------|

Notes:

Source: Uniform Data System 2013 and Health Resources and Services Administration Health Center Patient Survey 2014

GSEM = Generalized Structural Equation Model

MH = Mental Health, FTE= Full Time Equivalent, HC = Health Center

\* p<0.05, \*\* p<0.01, \*\*\* p<0.001
